# Supplementary material for: Expression of Glypican 3 Is an Independent Prognostic Biomarker in Primary Gastro-Esophageal Adenocarcinoma and Corresponding Serum Exosomes
Source: PubMed Central journal article supplement (PMC6572603; doi:10.3390/jcm8050696), 2019-05-16
Supplement: jcm-08-00696-s001.pdf [file jcm-08-00696-s001.pdf]

## Supplementary Figure 1

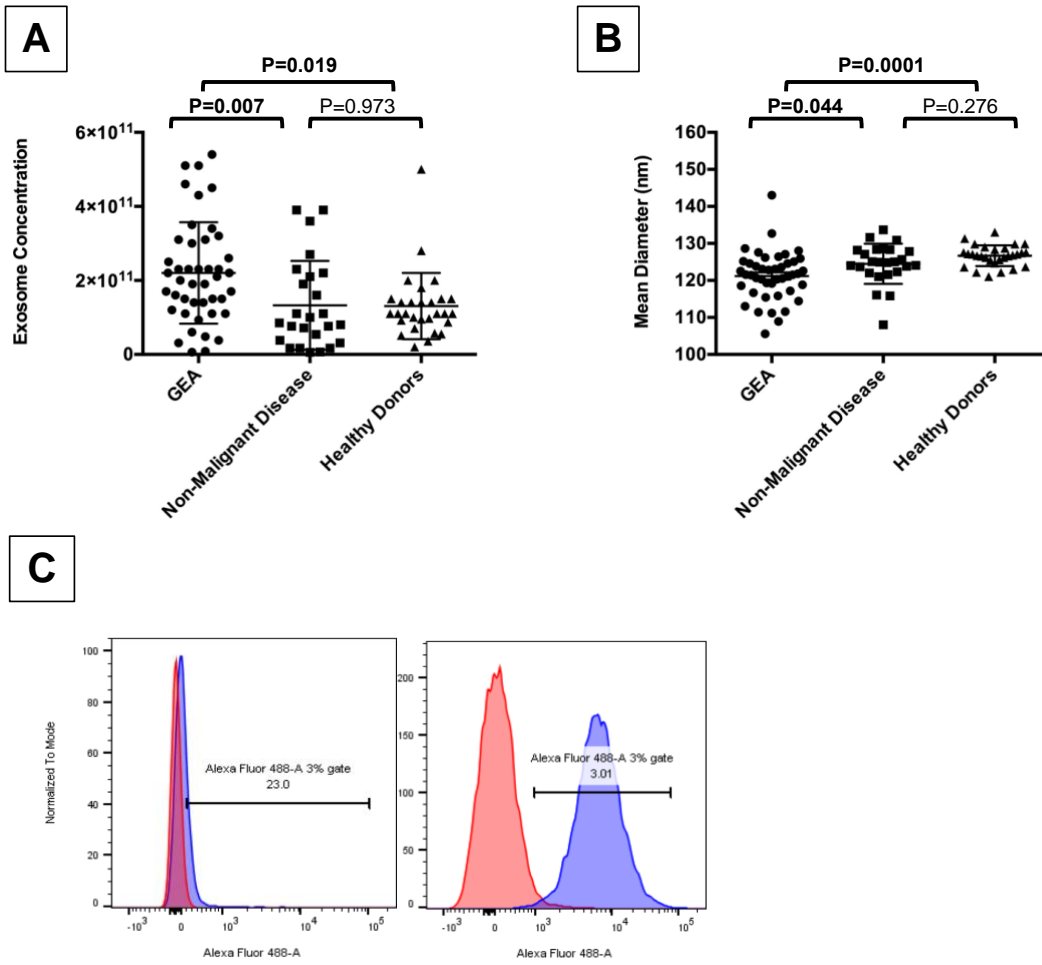

**Supplementary Figure 1.** (A) and (B) Dot plots showing the exosome concentration and mean exosome size of selected samples of 44 patients with GEA, 25 patients with non-malignant disease and 29 healthy donors. (C) Two representative histograms of GPC3 on exosome-bound latex beads isolated serum samples of a patient with histologically confirmed GEA (left panel) and a healthy donor (right panel) using flow cytometry.

## Supplementary Figure 2

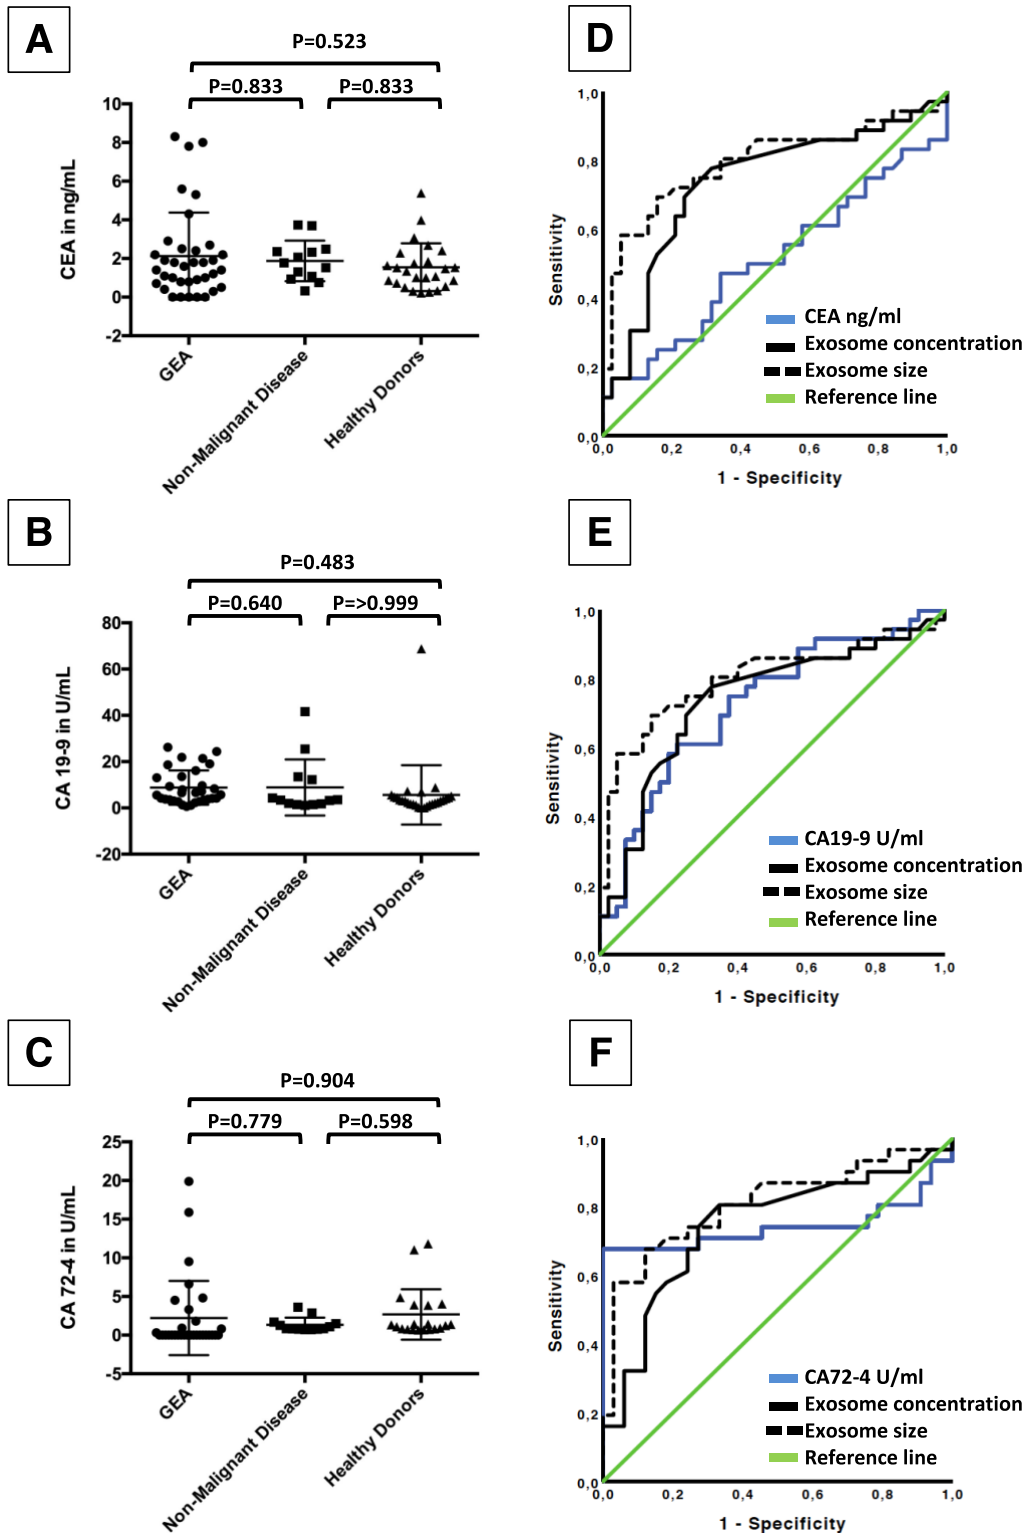

**Supplementary Figure 2.** (A), (B) and (C) Dot plots of the expression of CEA, CA 19-9, and CA 72-4 in human serum samples from patients with GEA, patients with non-malignant disease and healthy donors measured by immunoassays. (D), (E) and (F) ROC curves of the diagnostic sensitivity and specificity of the expression of CEA, CA 19-9 and CA 72-4 in human serum samples from patients with GEA vs. control subjects (non-malignant disease and healthy donors).

## Supplementary Figure 3

**A**

| Pairwise comparison of ROC curves |        |          |          |            |                |
|-----------------------------------|--------|----------|----------|------------|----------------|
| Variable                          | CA19-9 | CA72-4   | CEA      | eGPC3      | Combined Score |
| CA19-9                            | N.A.   | P = 0.65 | P = 0.03 | P = 0.02   | P = 0.004      |
| CA72-4                            |        | N.A.     | P = 0.04 | P = 0.09   | P = 0.006      |
| CEA                               |        |          | N.A.     | P < 0.0001 | P < 0.0001     |
| eGPC3                             |        |          |          | N.A.       | P = 0.84       |
| Combined Score                    |        |          |          |            | N.A.           |

**B**

Immunohistochemistry of GPC3

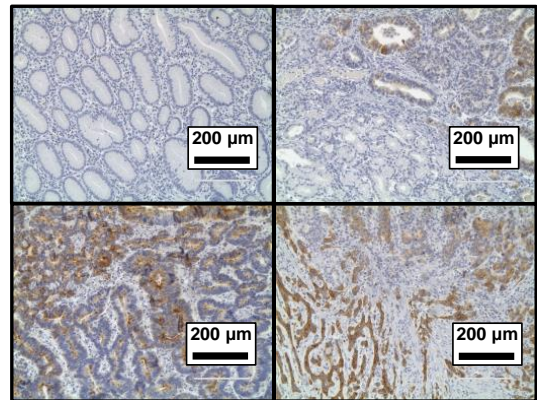

**C**

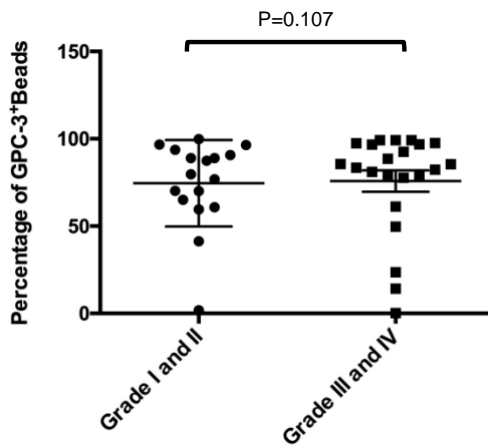

**D**

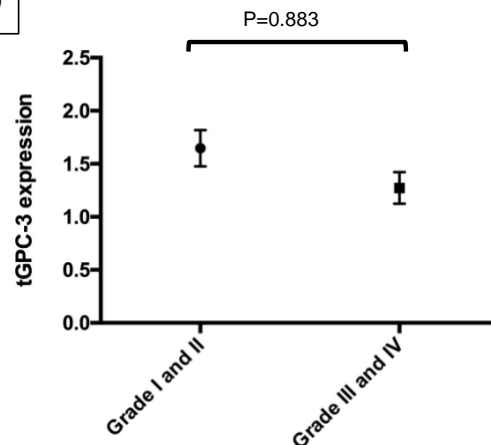

**E**

Low-grade GEA

|                       | tGPC3 <sup>low</sup> | tGPC3 <sup>high</sup> | P-Value |
|-----------------------|----------------------|-----------------------|---------|
| eGPC3 <sup>low</sup>  | 2                    | 7                     | 1.0     |
| eGPC3 <sup>high</sup> | 2                    | 6                     |         |

**F**

High-grade GEA

|                       | tGPC3 <sup>low</sup> | tGPC3 <sup>high</sup> | P-Value |
|-----------------------|----------------------|-----------------------|---------|
| eGPC3 <sup>low</sup>  | 4                    | 6                     | 0.19    |
| eGPC3 <sup>high</sup> | 9                    | 3                     |         |

**Supplementary Figure 3. (A)** Pairwise comparison of the AUC of ROC curves of selected markers including CA19-9, CA72-4, CEA, eGPC3 and a Combined Score. **(B)** Immunohistochemistry of GPC3 antibody on normal foveolar gastric mucosa (upper left panel) and GEA tissue. Representative images of GPC3 staining intensity of 1 (upper right panel), staining intensity of 2 (lower left panel) and staining intensity of 3 (lower right panel). **(C) and (D)** Dot plots of the association of the percentage of eGPC3+Beads (left panel) and tGPC3 expression (right panel) with tumor grade. **(E) and (F)** Association of eGPC3 and tGPC3 expression in relation to tumor grade in low-grade GEA (including grade I and II tumors, left panel) and high-grade GEA (including grade III and IV tumor, right panel).

## Supplementary Figure 4

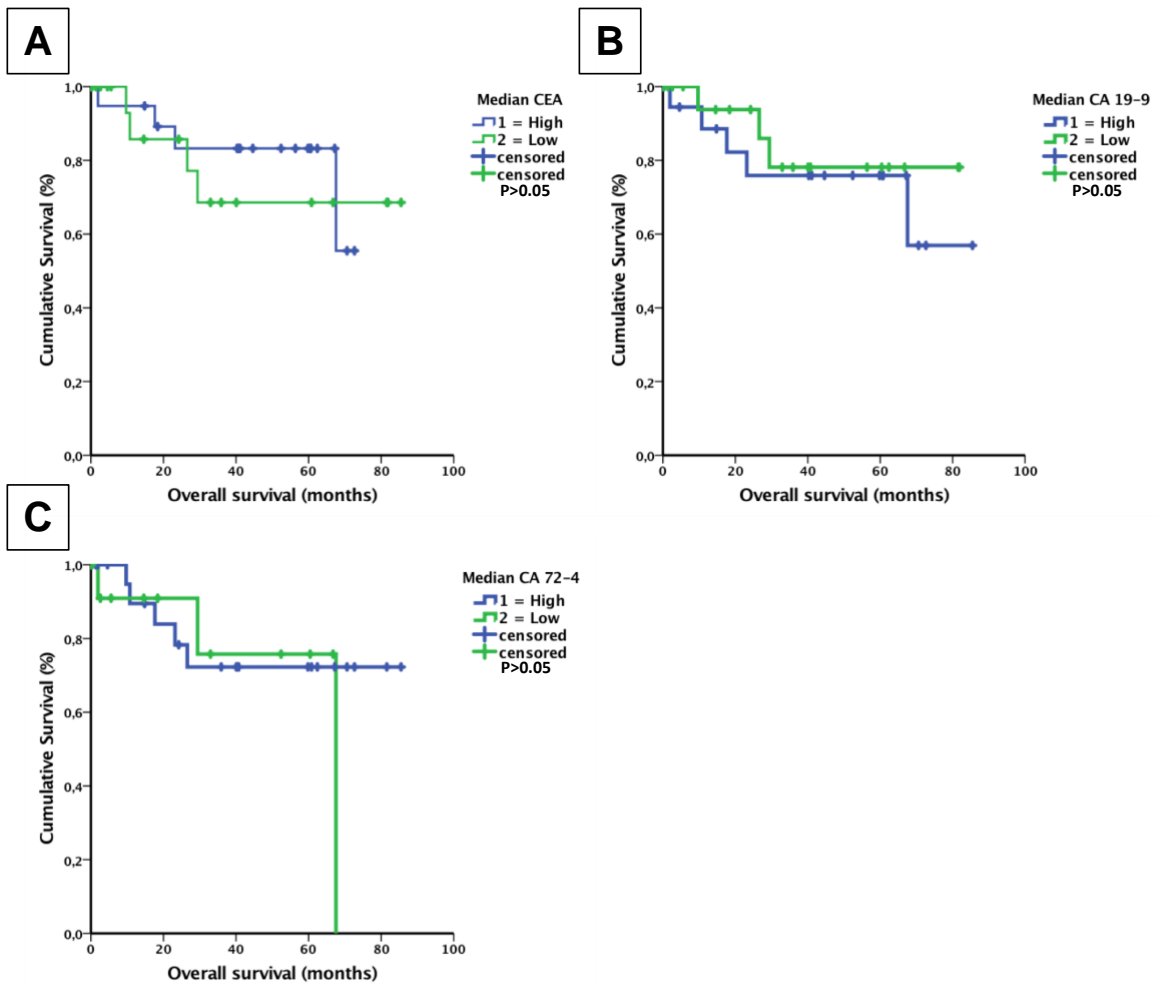

**Supplementary Figure 4.** Kaplan-Meier curves displaying overall survival in patients with GEA with high (blue line) and low (green line) expression of **(A)** CEA, **(B)** CA 19-9 and **(C)** CA 72-4 in blood serum samples. None of the three markers has been associated with significant dismal prognosis.
